# Supplementary material for: Low-Temperature Predicted Structures of Ag2S (Silver Sulfide)
Source: MDPI journal article supplement (doi:10.3390/nano13192638), 2023-09-25
Supplement: s1 [file s1]

# *Nanomaterials*

## **Supplementary Material**

### **Low-Temperature Predicted Structures of Ag<sub>2</sub>S Silver Sulfide**

**S. I. Sadovnikov<sup>1</sup>, M. G. Kostenko<sup>1</sup>, A. I. Gusev<sup>\*1</sup>, A. V. Lukoyanov<sup>2,3</sup>**

<sup>1</sup> Institute of Solid State Chemistry, Ural Branch of the Russian Academy of Sciences, 620990 Ekaterinburg, Russia; sadovnikov@ihim.uran.ru (SS); makskostenko@yandex.ru (MK); gusev@ihim.uran.ru (AG)

<sup>2</sup> Mikhhev Institute of Metal Physics, Ural Branch of the Russian Academy of Sciences, 20108 Ekaterinburg, Russia; lukoyanov@imp.uran.ru (AL)

<sup>3</sup> Ural Federal University named after the first President of Russia B. N. Yeltsin, 620002 Ekaterinburg, Russia; lukoyanov@imp.uran.ru (AL)

E-mail: gusev@ihim.uran.ru; Tel.: +08-343-3747306

---

\* Corresponding author. Tel.: +7 343 374 7306; fax: +7 343 374 4495.  
E-mail address: gusev@ihim.uran.ru (A.I. Gusev).

**Table S1**

Energies  $E_{\text{VASP}}$  of individual Ag and S atoms and the condensed metallic silver Ag and condensed sulfur S phase

| Atoms Ag and S     |                   |                        |                   | Condensed Ag (space group No.225 - $Fm\bar{3}m$ ) and S (space group No.70 - $Fddd$ ) phases |                     |                        |                     |
|--------------------|-------------------|------------------------|-------------------|----------------------------------------------------------------------------------------------|---------------------|------------------------|---------------------|
| number of atoms    |                   | $E_{\text{VASP}}$ (eV) |                   | number of atoms                                                                              |                     | $E_{\text{VASP}}$ (eV) |                     |
| $N_{\text{Ag-at}}$ | $N_{\text{S-at}}$ | $E_{\text{Ag-at}}$     | $E_{\text{S-at}}$ | $N_{\text{Ag-cond}}$                                                                         | $N_{\text{S-cond}}$ | $E_{\text{Ag-cond}}$   | $E_{\text{S-cond}}$ |
| 1                  | 1                 | -0.1982                | -1.0808           | 4                                                                                            | 128                 | -10.8628               | -528.1684           |

\* energies  $E_{\text{VASP}}$  are obtained by the DFT calculations.

**Table S2**

Model predicted cubic  $\text{Ag}_2\text{S}$  structures

| Space group             | Atom | Position and multiplicity | Atomic coordinates in the model structures |                               |                               |
|-------------------------|------|---------------------------|--------------------------------------------|-------------------------------|-------------------------------|
|                         |      |                           | $x/a \equiv x/a_{\text{cub}}$              | $y/b \equiv y/b_{\text{cub}}$ | $z/c \equiv z/c_{\text{cub}}$ |
| *No.224 - $Pn\bar{3}m$  | Ag   | 4( <i>b</i> )             | 0.2500001                                  | 0.2500001                     | 0.2500001                     |
|                         | S    | 2( <i>a</i> )             | 0                                          | 0                             | 0                             |
| **No.227 - $Fd\bar{3}m$ | Ag   | 32( <i>e</i> )            | 0.0800106                                  | 0.0800106                     | 0.0800106                     |
|                         | S1   | 8( <i>a</i> )             | 0                                          | 0                             | 0                             |
|                         | S2   | 8( <i>b</i> )             | 0.5                                        | 0.5                           | 0.5                           |

\* parameters of the predicted unit cell (space group  $Pn\bar{3}m$ ):  $a = b = c = 0.544009$  nm,  $Z = 2$ ,  $V = 0.16099736$  nm<sup>3</sup>,  $\mathbf{a} = [100]_{\text{cub}}$ ,  $\mathbf{b} = [010]_{\text{cub}}$ , and  $\mathbf{c} = [001]_{\text{cub}}$ ;

\*\* parameters of the predicted unit cell (space group  $Fd\bar{3}m$ ):  $a = b = c = 1.723559$  nm,  $Z = 8$ ,  $V = 5.120101924$  nm<sup>3</sup>,  $\mathbf{a} = [100]_{\text{cub}}$ ,  $\mathbf{b} = [010]_{\text{cub}}$ , and  $\mathbf{c} = [001]_{\text{cub}}$ .

**Table S3**

Model predicted tetragonal  $\text{Ag}_2\text{S}$  structures

| Space group            | Atom | Position and multiplicity | Atomic coordinates in the model structures |                                |                                |
|------------------------|------|---------------------------|--------------------------------------------|--------------------------------|--------------------------------|
|                        |      |                           | $x/a \equiv x/a_{\text{tetr}}$             | $y/b \equiv y/b_{\text{tetr}}$ | $z/c \equiv z/c_{\text{tetr}}$ |
| *No.116 - $P\bar{4}c2$ | Ag1  | 4( <i>e</i> )             | 0.2303562                                  | 0.2303562                      | 0.25                           |
|                        | Ag2  | 4( <i>f</i> )             | 0.2303562                                  | 0.2303562                      | 0.75                           |
|                        | S1   | 2( <i>b</i> )             | 0.5                                        | 0.5                            | 0.25                           |
|                        | S2   | 2( <i>c</i> )             | 0                                          | 0                              | 0                              |
| **No.123 - $P4/mmm$    | Ag1  | 1( <i>a</i> )             | 0                                          | 0                              | 0                              |
|                        | Ag2  | 1( <i>b</i> )             | 0                                          | 0                              | 0.5                            |
|                        | S    | 1( <i>d</i> )             | 0.5                                        | 0.5                            | 0.5                            |

\* parameters of the predicted unit cell (space group  $P\bar{4}c2$ ):  $a = b = 0.628234$  nm,  $c = 0.715433$  nm,  $Z = 4$ ,  $V = 0.282365157$  nm<sup>3</sup>,  $\mathbf{a} = [100]_{\text{tetr}}$ ,  $\mathbf{b} = [010]_{\text{tetr}}$ , and  $\mathbf{c} = [001]_{\text{tetr}}$ ;

\*\* parameters of the predicted unit cell (space group  $P4/mmm$ ):  $a = b = 0.357475$  nm,  $c = 0.546104$  nm,  $Z = 1$ ,  $V = 0.069785624$  nm<sup>3</sup>,  $\mathbf{a} = [100]_{\text{tetr}}$ ,  $\mathbf{b} = [010]_{\text{tetr}}$ , and  $\mathbf{c} = [001]_{\text{tetr}}$ .

**Table S4**Model predicted trigonal Ag<sub>2</sub>S structures

| Space group             | Atom | Position and multiplicity | Atomic coordinates in the model structures |                                |                                |
|-------------------------|------|---------------------------|--------------------------------------------|--------------------------------|--------------------------------|
|                         |      |                           | $x/a \equiv x/a_{\text{trig}}$             | $y/b \equiv y/b_{\text{trig}}$ | $z/c \equiv z/c_{\text{trig}}$ |
| *No.148 - $R\bar{3}$    | Ag   | 2( <i>c</i> )             | 0.2500007                                  | 0.2500007                      | 0.2500007                      |
|                         | S    | 1( <i>a</i> )             | 0                                          | 0                              | 0                              |
| **No. 166 - $R\bar{3}m$ | Ag1  | 2( <i>c</i> )             | 0.1249771                                  | 0.1249771                      | 0.1249771                      |
|                         | Ag2  | 2( <i>c</i> )             | 0.3750229                                  | 0.3750229                      | 0.3750229                      |
|                         | S1   | 1( <i>a</i> )             | 0                                          | 0                              | 0                              |
|                         | S2   | 1( <i>b</i> )             | 0.5                                        | 0.5                            | 0.5                            |

\* parameters of the predicted unit cell (space group  $R\bar{3}$ ):  $a = b = c = 0.440645$  nm,  $\alpha = 60.005^\circ$ ,  $V = 0.060506592$  nm<sup>3</sup>,  $Z = 1$ ;

\*\* parameters of the predicted unit cell (space group  $R\bar{3}m$ ):  $a = b = c = 0.763092$  nm,  $\alpha = 33.5637^\circ$ ,  $V = 0.120980424$  nm<sup>3</sup>,  $Z = 2$ .

**Table S5**Ag – S bond lengths for the predicted Ag<sub>2</sub>S structures with different symmetry

| Symmetry and space group                           | Bond     |             |
|----------------------------------------------------|----------|-------------|
|                                                    | type     | length (nm) |
| Cubic (No.224 - $Pn\bar{3}m$ )                     | Ag - S   | 0.23556     |
| Cubic (No.227 - $Fd\bar{3}m$ )                     | Ag – S1  | 0.23883     |
|                                                    | Ag – S2  | 0.65451     |
| Tetragonal (No.116 - $P\bar{4}c2$ )                | Ag1 – S1 | 0.23957     |
|                                                    | Ag1 – S2 | 0.27180     |
|                                                    | Ag2 – S1 | 0.23957     |
|                                                    | Ag2 – S2 | 0.27180     |
| Tetragonal (No.123 - $P4/mmm$ )                    | Ag1 – S  | 0.37209     |
|                                                    | Ag2 – S  | 0.25277     |
| Trigonal (No.148 - $R\bar{3}$ )                    | Ag - S   | 0.23174     |
| Trigonal (No.166 - $R\bar{3}m$ )                   | Ag1 – S1 | 0.25749     |
|                                                    | Ag2 – S2 | 0.25749     |
| Orthorhombic (No.64 - $Cmce$ )                     | Ag1 – S  | 0.24306     |
|                                                    | Ag2 – S  | 0.24357     |
| Orthorhombic (No.63 – $Cmcm$ )                     | Ag1 – S  | 0.24033     |
|                                                    | Ag2 – S  | 0.25233     |
| Orthorhombic (No.36 - $Cmc2_1$ )                   | Ag - S   | 0.25232     |
| Orthorhombic (No.19 - $P2_12_12_1$ )               | Ag1 – S  | 0.25682     |
|                                                    | Ag2 – S  | 0.26311     |
| Unrelaxed monoclinic (No.14 - $P2_1/c$ ) acanthite | Ag1 – S  | 0.25113     |
|                                                    | Ag2 – S  | 0.25475     |
| Relaxed monoclinic (No.14 - $P2_1/c$ ) acanthite   | Ag1 – S  | 0.25242     |
|                                                    | Ag2 – S  | 0.24030     |
| Monoclinic (No.14 - $P2_1/c$ )                     | Ag1 – S  | 0.24177     |
|                                                    | Ag2 – S  | 0.24281     |
| Triclinic (No.1 - $P1$ )                           | Ag1 – S1 | 0.24962     |
|                                                    | Ag1 – S3 | 0.24976     |
|                                                    | Ag2 – S2 | 0.24718     |
|                                                    | Ag2 – S4 | 0.24756     |
|                                                    | Ag3 – S2 | 0.24943     |
|                                                    | Ag3 – S4 | 0.24891     |
|                                                    | Ag4 – S1 | 0.24374     |
|                                                    | Ag4 – S4 | 0.24388     |
|                                                    | Ag5 – S1 | 0.24401     |
|                                                    | Ag5 – S4 | 0.24400     |
|                                                    | Ag6 – S1 | 0.24723     |
|                                                    | Ag6 – S3 | 0.24804     |
|                                                    | Ag7 – S2 | 0.24417     |
|                                                    | Ag7 – S3 | 0.24388     |
|                                                    | Ag8 – S2 | 0.24373     |
|                                                    | Ag8 – S3 | 0.24395     |

**Matrices of elastic stiffness constants computed for model Ag<sub>2</sub>S structures**

$$\mathbf{C}_{\text{cubic } Pn-3m} = \begin{pmatrix} 46.1554 & 43.2273 & 43.2273 & 0 & 0 & 0 \\ 43.2273 & 46.1554 & 43.2273 & 0 & 0 & 0 \\ 43.2273 & 43.2273 & 46.1554 & 0 & 0 & 0 \\ 0 & 0 & 0 & 1.1875 & 0 & 0 \\ 0 & 0 & 0 & 0 & 1.1875 & 0 \\ 0 & 0 & 0 & 0 & 0 & 1.1875 \end{pmatrix}, \quad (\text{S6})$$

$$\mathbf{C}_{\text{cubic } Fd-3m} = \begin{pmatrix} 5.8029 & 5.3912 & 5.3912 & 0 & 0 & 0 \\ 5.3912 & 5.8029 & 5.3912 & 0 & 0 & 0 \\ 5.3912 & 5.3912 & 5.8029 & 0 & 0 & 0 \\ 0 & 0 & 0 & 0.8795 & 0 & 0 \\ 0 & 0 & 0 & 0 & 0.8795 & 0 \\ 0 & 0 & 0 & 0 & 0 & 0.8795 \end{pmatrix}, \quad (\text{S7})$$

$$\mathbf{C}_{\text{tetr } P-4c2} = \begin{pmatrix} 77.3256 & 80.6809 & 178.5539 & 0 & 0 & 0 \\ 80.6809 & 77.3256 & 24.4436 & 0 & 0 & 0 \\ 24.4436 & 24.4436 & 46.9722 & 0 & 0 & 0 \\ 0 & 0 & 0 & 7.1893 & 0 & 0 \\ 0 & 0 & 0 & 0 & 7.1893 & 0 \\ 0 & 0 & 0 & 0 & 0 & 31.5106 \end{pmatrix}. \quad (\text{S8})$$

$$\mathbf{C}_{\text{tetr } P4/mmm} = \begin{pmatrix} 93.0592 & 77.4578 & 9.1840 & 0 & 0 & 0 \\ 77.4578 & 93.0592 & 9.1840 & 0 & 0 & 0 \\ 9.1840 & 9.1840 & 112.6081 & 0 & 0 & 0 \\ 0 & 0 & 0 & -9.5228 & 0 & 0 \\ 0 & 0 & 0 & 0 & -9.5228 & 0 \\ 0 & 0 & 0 & 0 & 0 & 30.1880 \end{pmatrix}, \quad (\text{S9})$$

$$\mathbf{C}_{\text{trig } R-3} = \begin{pmatrix} 84.3399 & 54.8023 & 54.9045 & 2.8741 & -1.1961 & -1.1750 \\ 54.8023 & 84.2519 & 55.0124 & -1.0602 & 2.9786 & -1.3465 \\ 54.9045 & 55.0124 & 84.1708 & -1.2232 & -1.2021 & 3.0918 \\ 2.8741 & -1.0602 & -1.2232 & 10.0111 & 2.6086 & 2.4867 \\ -1.1961 & 2.9786 & -1.2021 & 2.6086 & 9.9200 & 2.3735 \\ -1.1750 & -1.3465 & 3.0918 & 2.4867 & 2.3735 & 9.8357 \end{pmatrix}, \quad (\text{S10})$$

$$\mathbf{C}_{\text{trig } R-3m} = \begin{pmatrix} 76.4621 & 58.0645 & 58.7782 & -1.0093 & 2.4718 & 3.4956 \\ 58.0645 & 76.7396 & 59.8201 & 2.8060 & 0.6403 & -3.7360 \\ 58.7782 & 59.8201 & 76.3559 & -2.2633 & -3.9201 & -0.9024 \\ -1.0093 & 2.8060 & -2.2633 & 14.6368 & -0.5129 & 0.9157 \\ 2.4718 & 0.6403 & -3.9201 & -0.5129 & 14.0446 & -0.8503 \\ 3.4956 & -3.7360 & -0.9024 & 0.9157 & -0.8503 & 13.4434 \end{pmatrix}, \quad (\text{S11})$$

$$\mathbf{C}_{\text{orthorhomb } Cmc} = \begin{pmatrix} 98.4970 & 38.3156 & 22.4833 & 0 & 0 & 0 \\ 38.3156 & 44.7754 & 10.0698 & 0 & 0 & 0 \\ 22.4833 & 10.0698 & 29.2198 & 0 & 0 & 0 \\ 0 & 0 & 0 & 4.4577 & 0 & 0 \\ 0 & 0 & 0 & 0 & 12.5734 & 0 \\ 0 & 0 & 0 & 0 & 0 & 8.1594 \end{pmatrix}, \quad (\text{S12})$$

$$\mathbf{C}_{\text{orthorhomb } Cmce} = \begin{pmatrix} 65.3687 & 5.0551 & 4.3304 & 0 & 0 & 0 \\ 5.0551 & 57.2074 & 4.3660 & 0 & 0 & 0 \\ 4.3304 & 4.3660 & 11.8096 & 0 & 0 & 0 \\ 0 & 0 & 0 & 1.5834 & 0 & 0 \\ 0 & 0 & 0 & 0 & 1.8333 & 0 \\ 0 & 0 & 0 & 0 & 0 & 21.6154 \end{pmatrix}, \quad (\text{S13})$$

$$\mathbf{C}_{\text{mon } P21} = \begin{pmatrix} 11.5680 & -0.5756 & 3.5408 & 0 & -2.3344 & 0 \\ -0.5756 & 44.8670 & 8.2904 & 0 & -4.5026 & 0 \\ 3.5408 & 8.2904 & 44.6176 & 0 & -10.5227 & 0 \\ 0 & 0 & 0 & 31.1857 & 0 & -2.9951 \\ -2.3344 & -4.5026 & -10.5227 & 0 & 2.4748 & 0 \\ 0 & 0 & 0 & -2.9951 & 0 & 3.5431 \end{pmatrix}, \quad (\text{S14})$$

$$\mathbf{C}_{\text{mon unrelax } P21/c} = \begin{pmatrix} 57.6611 & 19.1243 & 40.2312 & 0 & -4.3388 & 0 \\ 19.1243 & 32.2911 & 18.1162 & 0 & 0.8730 & 0 \\ 40.2312 & 18.1162 & 64.2186 & 0 & -14.1836 & 0 \\ 0 & 0 & 0 & 7.0640 & 0 & -1.8039 \\ -4.33388 & 0.8730 & -14.4836 & 0 & 18.8466 & 0 \\ 0 & 0 & 0 & -1.8039 & 0 & 6.6861 \end{pmatrix}, \quad (\text{S15})$$

$$\mathbf{C}_{\text{mon relax } P21/c} = \begin{pmatrix} 53.8604 & 13.9430 & 46.1417 & 0 & -9.1408 & 0 \\ 13.9430 & 29.2109 & 19.1649 & 0 & -6.0901 & 0 \\ 46.1417 & 19.1649 & 74.1809 & 0 & -15.0413 & 0 \\ 0 & 0 & 0 & 9.9337 & 0 & -3.5613 \\ -9.1408 & -6.0901 & -15.0413 & 0 & 14.4149 & 0 \\ 0 & 0 & 0 & -3.5613 & 0 & 6.7978 \end{pmatrix}, \quad (\text{S16})$$

$$\mathbf{C}_{\text{tricl } P1} = \begin{pmatrix} 72.5669 & 20.5727 & 24.8878 & -0.0539 & -3.5796 & 1.1041 \\ 20.5727 & 36.9730 & 19.3270 & -0.2075 & -1.0575 & 0.7500 \\ 24.8878 & 19.3270 & 37.2742 & -0.2435 & -3.4275 & 1.2591 \\ -0.0539 & -0.2075 & -0.2435 & 9.6464 & 0.7459 & -0.3204 \\ -3.5796 & -1.0575 & -3.4275 & 0.7459 & -0.7738 & -0.3785 \\ 1.1040 & 0.7500 & 1.2591 & -0.3204 & -0.3785 & 2.8872 \end{pmatrix}. \quad (\text{S17})$$

### The Voigt-Reuss-Hill averaging scheme [1].

According to the Voigt-Reuss-Hill method, the Voigt and Reuss approximations lead to simplified relations between the polycrystalline constants and the single-crystal constants. For all crystal classes, these equations have the form:

$$B_V = [c_{11} + c_{22} + c_{33} + 2(c_{12} + c_{23} + c_{31})]/9, \quad (\text{S18a})$$

$$B_R = 1/[s_{11} + s_{22} + s_{33} + 2(s_{12} + s_{23} + s_{31})], \quad (\text{S18b})$$

$$G_V = [c_{11} + c_{22} + c_{33} + 3(c_{44} + c_{55} + c_{66}) - (c_{12} + c_{23} + c_{31})]/15, \quad (\text{S18c})$$

$$G_R = 15/[4(s_{11} + s_{22} + s_{33}) - 4(s_{12} + s_{23} + s_{31}) + 3(s_{44} + s_{55} + s_{66})], \quad (\text{S18d})$$

$$B_H = (B_V + B_R)/2, \quad G_H = (G_V + G_R)/2. \quad (\text{S19})$$

The elastic compliance constants  $s_{ij}$  are the coefficients of the inverted tensor of the elastic stiffness:  $(\mathbf{S}) = (\mathbf{C})^{-1}$ .

1. Hill, R. The elastic behaviour of a crystalline aggregate. *Proc. Phys. Soc. A*, **1952**, 65 (5), 349-354.
